# Supplementary material for: Assessing the Influence of Dyes Physico-Chemical Properties on Incorporation and Release Kinetics in Silk Fibroin Matrices
Source: MDPI journal article supplement (doi:10.3390/polym13050798), 2021-03-05
Supplement: s1 [file s1]

Supplementary Materials:

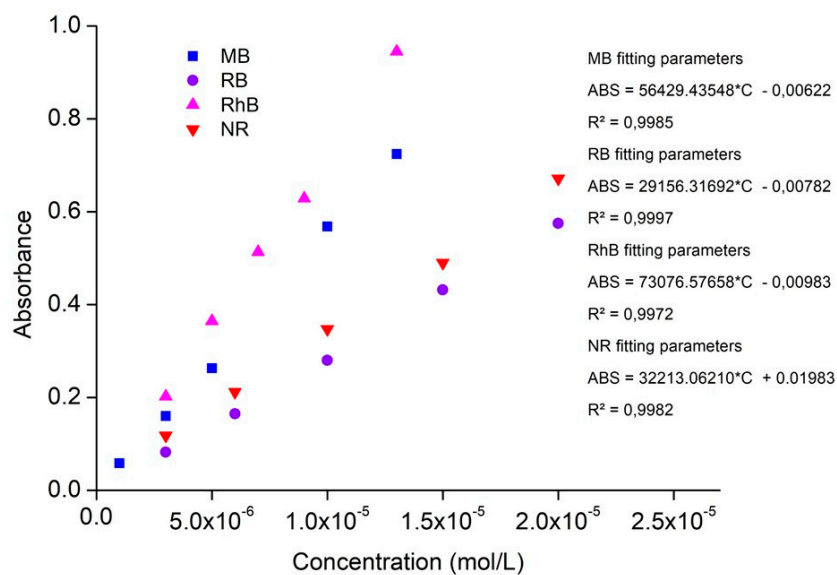

**Figure S1.** Calibration curve and fitting parameters for MB, RB, RhB and NR dyes.

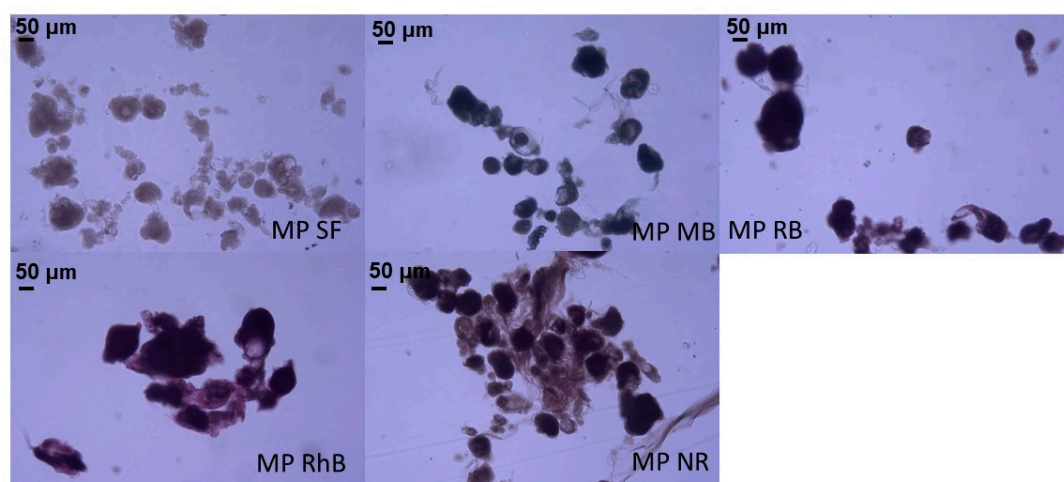

**Figure S2.** Optical microscopy image obtained from SF microparticles loaded with dyes.

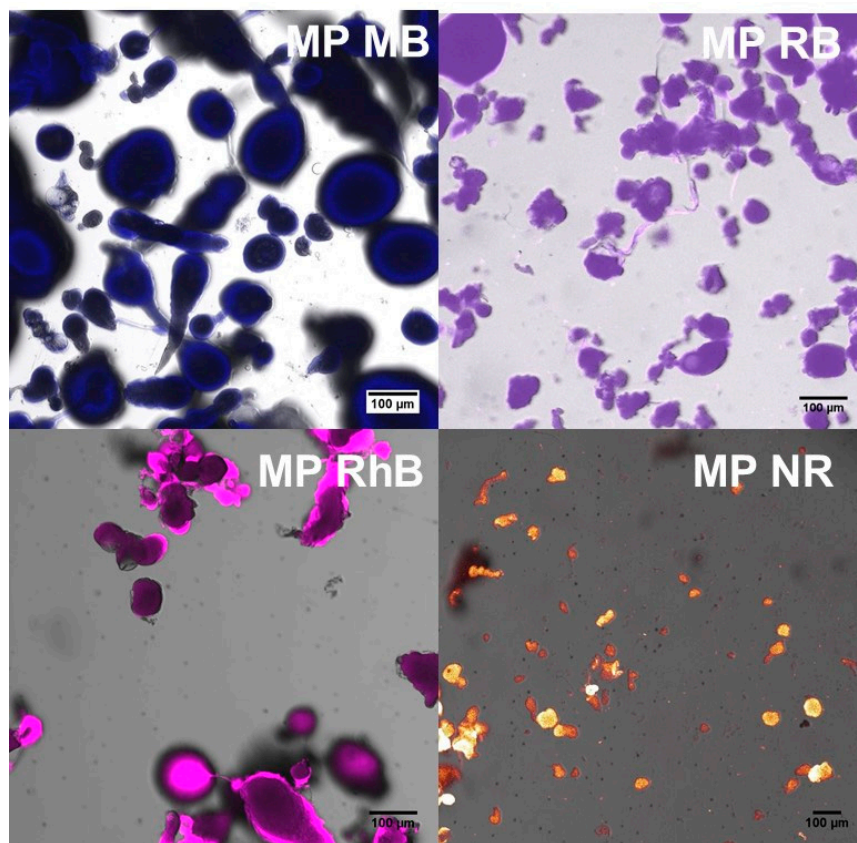

**Figure S3.** Confocal microscopy images of SF microparticles loaded with dyes.
